# Supplementary material for: The Monkey Puzzle: A Systematic Review of Studies of Stress, Social Hierarchies, and Heart Disease in Monkeys
Source: PLoS One. 2012 Mar 21;7(3):e27939. doi: 10.1371/journal.pone.0027939 (PMC3309950; doi:10.1371/journal.pone.0027939)
Supplement: Table S2 — Examples of quotations from papers citing primate studies. (DOC) [file pone.0027939.s004.doc]

| **Table S2: Examples of quotations from papers citing primate studies** |
| --- |
| **Examples of citations of primate studies linking the Shively and Sapolsky studies:**  Nordstrom et al. (2001)37: “This interpretation is supported by the finding in primates that stress promotes atherosclerosis in both males and females.*(i,ii)*  *References*: (*i).Kaplan (1982); (ii).Shively & Clarkson (1994)*  Wilkinson (1997)7: “Animal models have shown, subordinate social status has health consequences even when the physical environment and diet are invariant” *(i), (ii)*  *References: (i). Shively & Clarkson (1994); (ii). Sapolsky (1993)*  **Examples of “five-fold” claims for effect of downward mobility in social hierarchy on atherosclerosis:**  “The effects of manipulating social status were dramatic. Dominants who became subordinate had a fivefold excess of coronary plaques compared with animals who remained dominant.” 54  “Loss of social status resulting from being rehoused with more dominant animals was associated with fivefold increases in coronary artery atherosclerosis.” 7  “Downwardly mobile animals showed a fivefold increase in atherosclerosis over two years*.*”7 |

**Additional reference**

54. Brunner E. (1997) Socioeconomic determinants of health: stress and the biology of inequality. Br Med J 314:1472.
